# Supplementary material for: Voluntary Elbow Extension-Flexion Using Single Joint Hybrid Assistive Limb (HAL) for Patients of Spastic Cerebral Palsy: Two Cases Report
Source: PubMed Central journal article supplement (PMC6349701; doi:10.3389/fneur.2019.00002), 2019-01-22
Supplement: Data_Sheet_1.pdf [file Data_Sheet_1.pdf]

## *Supplementary Material*

### 1 Supplementary Tables

#### Supplementary Table 1.

Change in static voluntary elbow extension and flexion angle in Left-sided HAL in Case 1 and Right-sided HAL in Case 2.

|                | Case 1 (Lt) |           | Case 2 (Rt) |           |
|----------------|-------------|-----------|-------------|-----------|
|                | Rt          | Lt        | Rt          | Lt        |
| Pre-extension  | -30.0±7.6   | -30.6±8.6 | -49.4±11.2  | -9.4±4.2  |
| Post-extension | -28.8±9.9   | -28.8±9.2 | -40.7±4.5   | -7.1±2.7  |
|                | NS          | NS        | NS          | NS        |
| Pre-flexion    | 142.5±4.6   | 142.5±2.7 | 141.9±3.7   | 136.9±3.7 |
| Post-flexion   | 145.6±4.2   | 141.9±5.3 | 137.9±3.9   | 139.3±1.9 |
|                | NS          | NS        | NS          | NS        |

**Supplementary Table 2.**

Change in dynamic voluntary elbow extension and flexion angle in Left-sided HAL in Case 1 and Right-sided HAL in Case 2.

|                | Case 1 (Lt) |            | Case 2 (Rt) |           |
|----------------|-------------|------------|-------------|-----------|
|                | Rt          | Lt         | Rt          | Lt        |
| Pre-extension  | -79.5±11.5  | -85.7±12.4 | -68.8±9.1   | -36.5±4.9 |
| Post-extension | -71.5±21.1  | -84.0±17.7 | -70.5±8.6   | -37.2±5.4 |
|                | NS          | NS         | NS          | NS        |
| Pre-flexion    | 142.2±3.8   | 134.4±8.9  | 152.4±5.5   | 147.2±3.1 |
| Post-flexion   | 140.4±7.4   | 135.9±8.7  | 147.4±7.1   | 148.8±5.3 |
|                | NS          | NS         | NS          | NS        |
